# Supplementary material for: Saikosaponin D Attenuates Pancreatic Injury Through Suppressing the Apoptosis of Acinar Cell via Modulation of the MAPK Signaling Pathway
Source: Front Pharmacol. 2021 Oct 21;12:735079. doi: 10.3389/fphar.2021.735079 (PMC8566544; doi:10.3389/fphar.2021.735079)
Supplement: Supplementary file 2 [file DataSheet3.xlsx]

## Sheet: Sheet1
Fig.1C	Pathology Score
		Sham	CP	CP+SSd
		0.9	4.2	2.3
		1.1	5.3	2.8
		0.8	6.1	3.5
		0.6	3.8	2.1
		0.5	5.6	1.9
		0.8	4.1	1.8
Fig.1D&E	serum amylase(U/L)	Sham	CP	CP+SSd		serum lipsae(U/L)	sham	CP	CP+SSd
		2340	2422	2310			10	14	14
		2268	2130	2210			11	15	15
		2015	2567	2422			14	19	17
		2540	2588	2510			17	12	12
		2230	2089	2389			18	13	18
		2431	2447	2232			12	17	11
Fig.1F	serum IL-6(pg/mg)	Sham	CP	CP+SSd		serum TNFα(pg/mg)	sham	CP	CP+SSd		serum IL1β(pg/mg)	sham	CP	CP+SSd
		1.2	4.5	2.1			12.3	288.9	51.1			64.5	165.3	94.21
		1.9	4.7	1.9			10.9	302.5	66.43			67.9	178.3	85.3
		1	5.3	1.8			16.8	267.3	65.3			67.9	134.9	77.9
		0.88	5.9	2.2			15.3	241.1	52.1			63.2	154	85.8
		1.3	6.3	2.9			11.3	365.4	48			62.4	147.7	72.2
		0.66	6.6	2.3			20.8	290.2	39.9			67.8	177.3	86.3
Fig.1G	Pancreatic tissue IL-6(pg/mL)	Sham	CP	CP+SSd		Pancreatic tissue TNFα(pg/mL)	sham	CP	CP+SSd		Pancreatic tissue IL1β(pg/mL)	sham	CP	CP+SSd
		5	15	8			18	367	98			232	989	288
		8	17	7			26	340	189			220	1007	333
		4	18	6			55	320	178			118	1021	290
		6	19	9			37	311	152			168	889	456
		3	16	6			42	389	99			126	1138	269
		5	14	8			44	399	68			113	955	200
Fig.2A	Tunel-positive cells(%)	Sham	CP	CP+SSd
		1.2	75	33
		1.5	68	32
		2.1	70	35
		1.7	66	39
		2.6	71	21
		0.5	76	40
Fig.2B	WB
		GAPDH	BAX	BAX/GAPDH		GAPDH	Bcl-2	Bcl-2/GAPDH
	Sham	33289	7638	0.229445		33289	37284	1.12001
		33065	8736	0.264207		33065	38210	1.1556
		32887	7231	0.219874		32887	37339	1.13537
	CP	34785	20967	0.60276		34785	13978	0.40184
		33798	22195	0.656696		33798	12884	0.381206
		32256	22266	0.69029		32256	10619	0.32921
	CP+SSd	32456	8801	0.271167		32456	24666	0.759983
		33241	7962	0.239523		33241	26260	0.789988
		32276	7453	0.230915		32276	20588	0.637873
Fig.2C	WB
		GAPDH	Pro-cas3	Pro-cas3/GAPDH		GAPDH	Cleaved-cas3	Cleaved-cas3/GAPDH		GAPDH	Pro-cas9	Pro-cas9/GAPDH			GAPDH	Cleaved-cas9	Cleaved-cas9/GAPDH
	Sham	33210	9963	0.3		33210	10627	0.319994		33210	16273	0.490003			33210	3653	0.109997
		32167	11902	0.370007		32167	11258	0.349986		32167	13188	0.409985			32167	2895	0.0899991
		30789	10468	0.339992		30789	11670	0.379031		30789	13547	0.439995			30789	3695	0.12001
	CP	29876	5676	0.189985		29876	39436	1.31999		29876	22705	0.759975			29876	8664	0.289999
		30121	4819	0.159988		30121	41868	1.38999		30121	24398	0.81			30121	9638	0.319976
		28990	5218	0.179993		28990	37107	1.27999		28990	22902	0.789997			28990	8987	0.310003
	CP+SSd	30125	9941	0.329992		30125	9037	0.299983		30125	16267	0.539983			30125	4519	0.150008
		29988	11395	0.379985		29988	12295	0.409997		29988	15594	0.520008			29988	4798	0.159997
		28786	9211	0.319982		28786	13241	0.459981		28786	14384	0.499687			28786	5181	0.179983
Fig.3A	WB
		GAPDH	p-p38	p-p38/GAPDH		GAPDH	p-JNK	p-JNK/GAPDH		GAPDH	p-ERK	p-ERK/GAPDH
	Sham	33123	3313	0.100021		33123	46389	1.40051		33123	3615	0.109139
		32768	2589	0.07901		32768	42576	1.29932		32768	3740	0.114136
		32134	3496	0.108794		32134	40496	1.26022		32134	2913	0.0906516
	CP	32896	12533	0.380989		32896	59418	1.80624		32896	15900	0.483341
		31654	15760	0.497883		31654	61606	1.94623		31654	13467	0.425444
		31589	14092	0.446105		31589	59559	1.88543		31589	13029	0.412454
	CP+SSd	32980	8674	0.263008		32980	43681	1.32447		32980	7125	0.21604
		33203	9049	0.272536		33203	41812	1.25928		33203	7489	0.225552
		32267	9383	0.290792		32267	40255	1.24756		32267	8475	0.262652
Fig.4A	CCK8
	SSd concentration（μM）	0	1	10	20	30	40	50
	OD	0.465	0.53	0.416	0.303	0.194	0.172	0.143
		0.455	0.499	0.446	0.267	0.201	0.204	0.129
		0.467	0.433	0.485	0.294	0.167	0.172	0.124
	0.46	0.453	0.482	0.436	0.278	0.183	0.163	0.133
	survival(%)	1.01087	1.15217	0.904348	0.658696	0.421739	0.373913	0.31087
		0.98913	1.08478	0.969565	0.580435	0.436957	0.443478	0.280435
		1.01522	0.941304	1.05435	0.63913	0.363043	0.373913	0.269565
		0.984783	1.04783	0.947826	0.604348	0.397826	0.354348	0.28913
Fig.4B	Apoptosis(%)	early apoptosis	late apoptosis	apoptosis
	Control	4.49	2.29	6.78
		5.34	2.57	7.91
		5.22	2.43	7.65
	Cerulein	26.11	4.97	31.08
		28.22	5.33	33.55
		27.36	5.02	32.38
	Cerulein+SSd(2.5μM)	5.45	2.95	8.4
		6.24	3.11	9.35
		5.99	3.48	9.47
	Cerulein+SSd(5μM)	3.71	1.61	5.32
		3.23	1.37	4.6
		3.08	1.29	4.37
Fig.4C		GAPDH	Bax	Bax-GAPDH	delta CT-ave	Bax ref to control (ave)		Bcl-2	Bcl-2-GAPDH	delta CT-ave	Bcl-2 ref to control (ave)
	Control	18.2653	22.023	3.75776	0.0357591	0.975518		26.957	8.69172	0.196417	0.872715
		18.331	22.018	3.68696	-0.0350379	1.02458		27.0446	8.71355	0.218251	0.859607
		18.2981	22.0205	3.72236	0.00036	0.99975		26.3788	8.08066	-0.41464	1.33297
			ave	3.72236				ave	8.49531
	Cerulein	18.3095	21.6744	3.36493	-0.357074	1.28083		27.969	9.65955	1.16425	0.446197
		18.3304	21.727	3.39661	-0.325395	1.25301		27.9136	9.58318	1.08788	0.470454
		18.3199	21.653	3.33307	-0.38893	1.30942		27.9922	9.67224	1.17694	0.442289
	Cerulein+SSd(2.5μM)	18.8036	23.2942	4.49052	0.768517	0.58702		27.4697	8.66605	0.170754	0.888378
		18.6858	22.9561	4.27026	0.548259	0.683845		27.316	8.63018	0.134877	0.910748
		18.7443	23.1804	4.43609	0.71409	0.60959		27.2589	8.51456	0.01926	0.986739
	Cerulein+SSd(5μM)	17.9354	22.8004	4.865	1.143	0.452816		25.7604	7.825	-0.670302	1.59141
		17.906	22.6819	4.77584	1.05384	0.481684		25.9969	8.09088	-0.404424	1.32356
		17.9302	22.8972	4.967	1.245	0.421908		25.8932	7.963	-0.5323	1.44623
		GAPDH	IL-6	IL-6-GAPDH	delta CT-ave	IL-6 ref to control (ave)		TNFα	TNFα-GAPDH	delta CT-ave	TNFα-2 ref to control (ave)		IL-1β	IL-1β-GAPDH	delta CT-ave	IL-1β-2 ref to control (ave)
	Control	18.2653	31.2629	12.9976	-0.351851	1.2762		36.271	18.0057	-0.201475	1.14987		33.2146	14.9493	-0.103199	1.07415
		18.331	31.7917	13.4607	0.111238	0.925793		36.3574	18.0264	-0.180826	1.13353		33.5783	15.2473	0.194779	0.873707
		18.2981	31.8882	13.5901	0.24062	0.846382		36.8877	18.5895	0.382301	0.767213		33.2673	14.9692	-0.0833212	1.05945
			ave	13.3495				ave	18.2072				ave	15.0553
	Cerulein	18.3095	29.2758	10.9663	-2.38318	5.21687		35.6053	17.2958	-0.91137	1.88083		31.2676	12.9582	-2.0943	4.2702
		18.3304	29.6407	11.3102	-2.03926	4.11036		35.6427	17.3123	-0.894917	1.8595		30.9678	12.6374	-2.4151	5.33355
		18.3199	29.4988	11.1788	-2.17069	4.50237		35.6839	17.364	-0.843239	1.79407		31.4533	13.1333	-1.91917	3.78206
	Cerulein+SSd(2.5μM)	18.8036	31.2318	12.4281	-0.921365	1.89391		36.9895	18.1858	-0.0213653	1.01492		32.6272	13.8235	-1.22898	2.34401
		18.6858	31.0911	12.4053	-0.944214	1.92414		36.9251	18.2393	0.0320631	0.978021		32.0909	13.4051	-1.64744	3.13277
		18.7443	31.0834	12.3391	-1.0104	2.01447		37.0725	18.3281	0.120919	0.919602		32.3379	13.5936	-1.45894	2.74907
	Cerulein+SSd(5μM)	17.9354	30.805	12.8696	-0.479862	1.39461		36.8171	18.8817	0.674517	0.626542		32.9188	14.9834	-0.069113	1.04907
		17.906	30.6587	12.7527	-0.596792	1.51235		36.489	18.583	0.375803	0.770676		32.8659	14.9599	-0.0926366	1.06632
		17.9302	30.7447	12.8145	-0.53496	1.4489		36.3327	18.4025	0.195241	0.873427		32.4833	14.5531	-0.499412	1.41364
Fig.4D	WB	GAPDH	BAX	BAX/GAPDH		GAPDH	Bcl-2	Bcl-2/GAPDH
	Control	29825	45036	1.51001		29825	36685	1.23001
		26541	41935	1.58001		26541	33442	1.26001
		25436	36373	1.42998		25436	32812	1.28998
	Cerulein	28796	54424	1.88998		28796	28338	0.984095
		27654	52819	1.90999		27654	26824	0.969986
		26471	47293	1.7866		26471	26735	1.00997
	Cerulein+SSd(2.5μM)	28765	57530	2		28765	64434	2.24001
		26547	56280	2.12001		26547	56810	2.13998
		27651	61662	2.23001		27651	63044	2.27999
	Cerulein+SSd(5μM)	27658	41764	1.51002		27658	60848	2.20001
		27854	40110	1.44001		27854	56544	2.03001
		25498	35952	1.40999		25498	53036	2.08001
Fig.4E	WB	GAPDH	Cleaved-cas3	Cleaved-cas3/GAPDH		GAPDH	Cleaved-cas9	Cleaved-cas9/GAPDH		GAPDH	Pro-cas3	Pro-cas3/GAPDH		GAPDH	Pro-cas9	Pro-cas9/GAPDH
	Control	30112	18669	0.619985		30112	7227	0.240004		30112	18924	0.628454		30112	18113	0.601521
		29887	20323	0.679995		29887	6874	0.23		29887	19225	0.643256		29887	17099	0.572122
		30101	19265	0.640012		30101	8428	0.279991		30101	18988	0.63081		30101	19837	0.659015
	Cerulein	31221	66189	2.12002		31221	16235	0.520003		31221	10327	0.330771		31221	11238	0.35995
		30100	67123	2.23		30100	16555	0.55		30100	9678	0.321528		30100	10986	0.364983
		29651	61674	2.08		29651	14529	0.49		29651	9835	0.331692		29651	12378	0.417456
	Cerulein+SSd(2.5μM)	31124	20542	0.660005		31124	3734	0.119972		31124	17854	0.573641		31124	21839	0.701677
		30088	19557	0.649993		30088	3008	0.0999734		30088	18832	0.625897		30088	22763	0.756547
		28879	17616	0.609993		28879	2310	0.0799889		28879	17683	0.612313		28879	22111	0.765643
	Cerulein+SSd(5μM)	30224	16321	0.540001		30224	4231	0.139988		30224	17779	0.588241		30224	20983	0.69425
		28899	16472	0.569985		28899	4335	0.150005		28899	18001	0.622894		28899	22006	0.76148
		31278	18767	0.600006		31278	3440	0.109981		31278	17932	0.57331		31278	21788	0.696592
Fig.5A	Apoptosis(%)	early apoptosis	late apoptosis	apoptosis
	Control	7.24	3.88	11.12
		7.09	3.29	10.38
		7.45	4.44	11.89
	PSC CM	26.71	8.33	35.04
		27.17	9.04	36.21
		26.92	8.86	35.78
	PSC CM+SSd	13.87	4.03	17.9
		13.66	3.54	17.2
		14.02	4.28	18.3
	PSC CM+Cerulein	31.26	12.47	43.73
		32.03	12.52	44.55
		30.11	11.27	41.38
	PSC CM+Cerulein+SSd	19.58	6.83	26.41
		18.88	6.91	25.79
		19.78	6.88	26.66
Fig.5B		GAPDH	Bax	Bax-GAPDH	delta CT-ave	Bax ref to control (ave)		Bcl-2	Bcl-2-GAPDH	delta CT-ave	Bcl-2 ref to control (ave)
	Control	17.8408	22.4144	4.57369	-0.130711	1.09483		25.3101	7.46936	0.0872442	0.941319
		17.9776	22.565	4.5874	-0.117003	1.08448		25.2484	7.27077	-0.111345	1.08023
		17.8834	22.8357	4.9523	0.247899	0.842122		25.2897	7.40622	0.0241	0.983434
			ave	4.70446				ave	7.38212
	PSC CM	17.2125	21.5626	4.35011	-0.354294	1.27836		25.2198	8.00732	0.625196	0.648332
		17.2954	21.6776	4.38217	-0.322233	1.25026		25.6234	8.32798	0.945858	0.519121
		17.3356	21.6522	4.31657	-0.38783	1.30842		25.5189	8.18321	0.801093	0.573914
	PSC CM+SSd	17.5678	23.4277	5.85986	1.15546	0.448923		24.2839	6.71606	-0.66606	1.58673
		17.5865	23.3597	5.77319	1.06879	0.476719		24.589	7.00247	-0.37965	1.30103
		17.6012	23.5452	5.94397	1.23957	0.423499		24.4456	6.84437	-0.53775	1.45171
				0	-4.7044	26.0715
	PSC CM+Cerulein	17.6575	21.66	4.00253	-0.701868	1.62661		26.1796	8.52214	1.14002	0.453753
		17.7011	21.7189	4.01782	-0.68658	1.60946		26.1858	8.4847	1.10258	0.465683
		17.6874	21.7187	4.03127	-0.673129	1.59453		26.2478	8.56039	1.17827	0.441881
	PSC CM+Cerulein+SSd	17.7234	22.0684	4.34497	-0.35943	1.28292		25.5172	7.79382	0.4117	0.751737
		17.7201	22.2209	4.50078	-0.20362	1.15158		25.4632	7.7431	0.36098	0.778635
		17.6966	22.0974	4.40086	-0.30354	1.23417		25.3822	7.6856	0.30348	0.810295
		GAPDH	IL-6	IL-6-GAPDH	delta CT-ave	IL-6 ref to control (ave)		TNFα	TNFα-GAPDH	delta CT-ave	TNFα-2 ref to control (ave)		IL-1β	IL-1β-GAPDH	delta CT-ave	IL-1β-2 ref to control (ave)
	Control	17.8408	33.069	15.2283	-0.0611285	1.04328		33.1038	15.263	0.447345	0.733391		32.0379	14.1971	-0.000966868	1.00067
		17.9776	33.3332	15.3557	0.0662633	0.955109		32.2909	14.3133	-0.502404	1.41657		32.0896	14.1121	-0.0860099	1.06143
		17.8834	33.1678	15.2844	-0.00503	1.00349		32.7542	14.8708	0.0550721	0.962546		32.1685	14.285	0.086973	0.941496
			ave	15.2894				ave	14.8157				ave	14.1981
	PSC CM	17.2125	31.6736	14.4611	-0.828294	1.77558		23.6996	6.48716	-8.32853	321.469		29.6875	12.475	-1.72306	3.30136
		17.2954	31.7254	14.43	-0.859433	1.81432		23.7738	6.47838	-8.33731	323.431		30.0238	12.7283	-1.46973	2.7697
		17.3356	31.9771	14.6415	-0.64792	1.56691		23.9745	6.6389	-8.17679	289.374		29.8877	12.552	-1.64606	3.12977
				0
	PSC CM+SSd	17.5678	32.9	15.3322	0.04279	0.970776		25.1653	7.59749	-7.2182	148.9		31.3328	13.765	-0.43311	1.35014
		17.5865	32.7229	15.1364	-0.15304	1.11191		25.1004	7.51389	-7.3018	157.783		31.0854	13.4989	-0.699171	1.62357
		17.6012	32.6667	15.0654	-0.22397	1.16794		25.0125	7.41125	-7.40444	169.418		31.6658	14.0646	-0.133477	1.09693
				0
	PSC CM+Cerulein	17.6575	30.5621	12.9046	-2.38483	5.22282		23.8695	6.21197	-8.60372	389.025		28.7849	11.1274	-3.07063	8.40139
		17.7011	30.9499	13.2488	-2.04062	4.11422		23.8773	6.17617	-8.63952	398.8		29.0029	11.3018	-2.89631	7.44522
		17.6874	30.7941	13.1067	-2.18271	4.54006		23.9906	6.30315	-8.51254	365.199		29.2784	11.591	-2.60707	6.09264
				0
	PSC CM+Cerulein+SSd	17.7234	32.5393	14.8159	-0.47351	1.38848		24.4909	6.76749	-8.0482	264.697		30.8754	13.152	-1.04604	2.06485
		17.7201	32.419	14.6989	-0.59047	1.50574		24.4776	6.75753	-8.05816	266.531		30.9563	13.2362	-0.961832	1.94778
		17.6966	32.451	14.7544	-0.53501	1.44895		24.5021	6.80549	-8.0102	257.816		30.7632	13.0666	-1.13144	2.19077
Fig.5C	WB	GAPDH	BAX	BAX/GAPDH		GAPDH	Bcl-2	Bcl-2/GAPDH
	Control	31004	16432	0.529996		31004	35345	1.14001
		30228	15416	0.509991		30228	32949	1.09002
		30194	14493	0.479996		30194	35025	1.16
	PSC CM	31896	41465	1.30001		31896	22008	0.689992
		32769	40356	1.23153		32769	21628	0.660014
		30988	39677	1.2804		30988	19522	0.629986
	PSC CM+SSd	30101	18362	0.610013		30101	33713	1.12
		29302	17288	0.589994		29302	33687	1.14965
		29659	18982	0.640008		29659	34998	1.18001
	PSC CM+Cerulein	31229	37789	1.21006		31229	16551	0.529988
		30297	36053	1.18999		30297	16996	0.56098
		30889	37993	1.22998		30889	15753	0.509987
	PSC CM+Cerulein+SSd	29887	20024	0.66999		29887	32278	1.08
		28703	19805	0.689998		28703	32147	1.11999
		30128	21391	0.710004		30128	31333	1.04
Fig.5D	WB	GAPDH	Cleaved-cas3	Cleaved-cas3/GAPDH		GAPDH	Cleaved-cas9	Cleaved-cas9/GAPDH		GAPDH	Pro-cas3	Pro-cas3/GAPDH		GAPDH	Pro-cas9	Pro-cas9/GAPDH
	Contro	29337	9975	0.340014		29337	21709	0.739987		29337	37864	1.29066		29337	28976	0.987695
		28768	8343	0.29001		28768	22439	0.779999		28768	39027	1.35661		28768	30213	1.05023
		29001	8990	0.309989		29001	20590	0.709976		29001	40126	1.38361		29001	29987	1.034
	PSC CM	29337	14962	0.510004		29337	38431	1.30998		29337	36784	1.25384		29337	24001	0.818114
		29887	14346	0.480008		29887	40945	1.36999		29887	37024	1.2388		29887	20087	0.672098
		29048	12781	0.439996		29048	40086	1.37999		29048	35489	1.22174		29048	22087	0.760362
	PSC CM+SSd	26509	2916	0.11		26509	21252	0.80169		26509	36772	1.38715		26509	28397	1.07122
		27991	3359	0.120003		27991	22672	0.809975		27991	37846	1.35208		27991	29653	1.05938
		25420	3305	0.130016		25420	23132	0.909992		25420	38647	1.52034		25420	27680	1.08891
	PSC CM+Cerulein	25346	27881	1.10002		25346	35865	1.41502		25346	22562	0.89016		25346	15638	0.616981
		24908	28893	1.15999		24908	34196	1.37289		24908	21389	0.85872		24908	16529	0.663602
		25119	24868	0.990008		25119	34915	1.38998		25119	20510	0.816513		25119	15332	0.610375
	PSC CM+Cerulein+SSd	26908	20450	0.759997		26908	20988	0.779991		26908	32086	1.19243		26908	28753	1.06857
		26754	18995	0.709987		26754	21135	0.789975		26754	34287	1.28157		26754	28769	1.07532
		27002	18631	0.689986		27002	22142	0.820013		27002	33271	1.23217		27002	29997	1.11092
Fig.6A	WB
		GAPDH	p-p38	p-p38/GAPDH		GAPDH	p-JNK	p-JNK/GAPDH		GAPDH	p-ERK	p-ERK/GAPDH
	Control	31118	27695	0.889999		31118	17426	0.559997		31118	9958	0.320008
		30993	28513	0.919982		30993	13947	0.450005		30993	10228	0.33001
		32333	31039	0.959979		32333	16813	0.519995		32333	10023	0.309993
	Cerulein	31220	42771	1.36999		31220	41210	1.31999		31220	58694	1.88001
		30999	43708	1.40998		30999	39059	1.26001		30999	56108	1.80999
		31232	43412	1.38998		31232	40289	1.28999		31232	55905	1.78999
	Cerulein+SSd(2.5μM)	31770	24781	0.780013		31770	14297	0.450016		31770	18744	0.589991
		30658	24220	0.790006		30658	17168	0.559984		30658	16862	0.550003
		30883	25015	0.809993		30883	17603	0.56999		30883	18839	0.610012
	Cerulein+SSd(5μM)	31224	27477	0.879996		31224	6557	0.209999		31224	8118	0.259992
		30226	27808	0.920003		30226	5743	0.190002		30226	9370	0.309998
		30678	26997	0.880012		30678	5215	0.169992		30678	8283	0.269998
Fig.6B	WB	GAPDH	p-p38	p-p38/GAPDH		GAPDH	p-JNK	p-JNK/GAPDH		GAPDH	p-ERK	p-ERK/GAPDH
	Control	31008	13333	0.429986		31008	12093	0.389996		31008	19225	0.620001
		30785	12006	0.389995		30785	12622	0.410005		30785	18163	0.589995
		30991	13946	0.450002		30991	13326	0.429996		30991	20764	0.670001
	PSC CM	31224	27477	0.879996		31224	38093	1.21999		31224	21232	0.67999
		31011	25429	0.819999		31011	39384	1.27		31011	22018	0.710006
		30711	24262	0.79001		30711	36239	1.18		30711	21805	0.710006
	PSC CM+SSd	29899	9568	0.320011		29899	23022	0.769992		29899	19239	0.643466
		30255	11497	0.380003		30255	20876	0.690002		30255	20061	0.663064
		30668	8894	0.290009		30668	18707	0.609984		30668	23561	0.76826
	PSC CM+Cerulein	30288	39980	1.31999		30288	43615	1.44001		30288	56941	1.87999
		30447	40799	1.34		30447	44452	1.45998		30447	55414	1.82002
		31207	39945	1.28		31207	43378	1.39001		31207	56485	1.81001
	PSC CM+Cerulein+SSd	30344	30647	1.00999		30344	24579	0.810012		30344	43089	1.42002
		30592	33345	1.08999		30592	26615	0.869999		30592	44052	1.43998
		31008	30388	0.980005		31008	24496	0.78999		31008	43411	1.39999
