# Supplementary figures and images for: Saikosaponin D Attenuates Pancreatic Injury Through Suppressing the Apoptosis of Acinar Cell via Modulation of the MAPK Signaling Pathway
Source: Frontiers journal article supplement (doi:10.3389/fphar.2021.735079), 2021-10-21

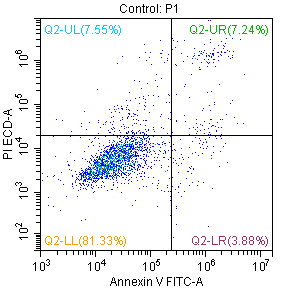


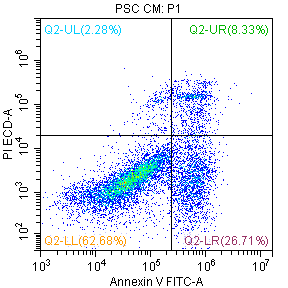


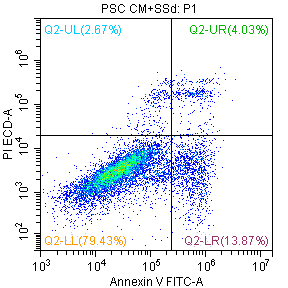

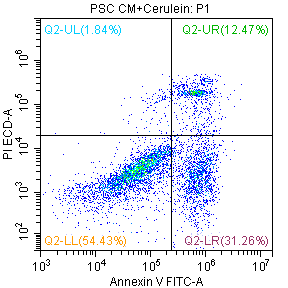


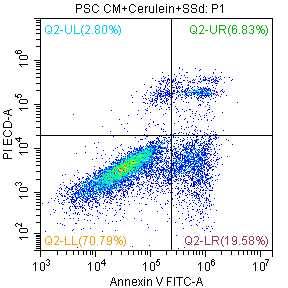

Supplement: Data_Sheet_1.ZIP [file Data_Sheet_1.ZIP]
